# Supplementary material
Source: publisher figshare collection journal article supplement (https://springernature.figshare.com/ndownloader/files/23529428)
Supplement: Supplementary file 1 [file 23529428]

Measurement(s),administrative region • Socioeconomic Indicator
Technology Type(s),digital curation
Factor Type(s),time period
Sample Characteristic - Environment,anthropogenic environment
Sample Characteristic - Location,Poland • Czech Republic
